# Supplementary material for: Characterisation of protein isoforms encoded by the Drosophila Glycogen Synthase Kinase 3 gene shaggy
Source: PubMed Central journal article supplement (PMC7410302; doi:10.1371/journal.pone.0236679), 2020-08-06
Supplement: pone.0236679.s002.pdf [file pone.0236679.s002.pdf]

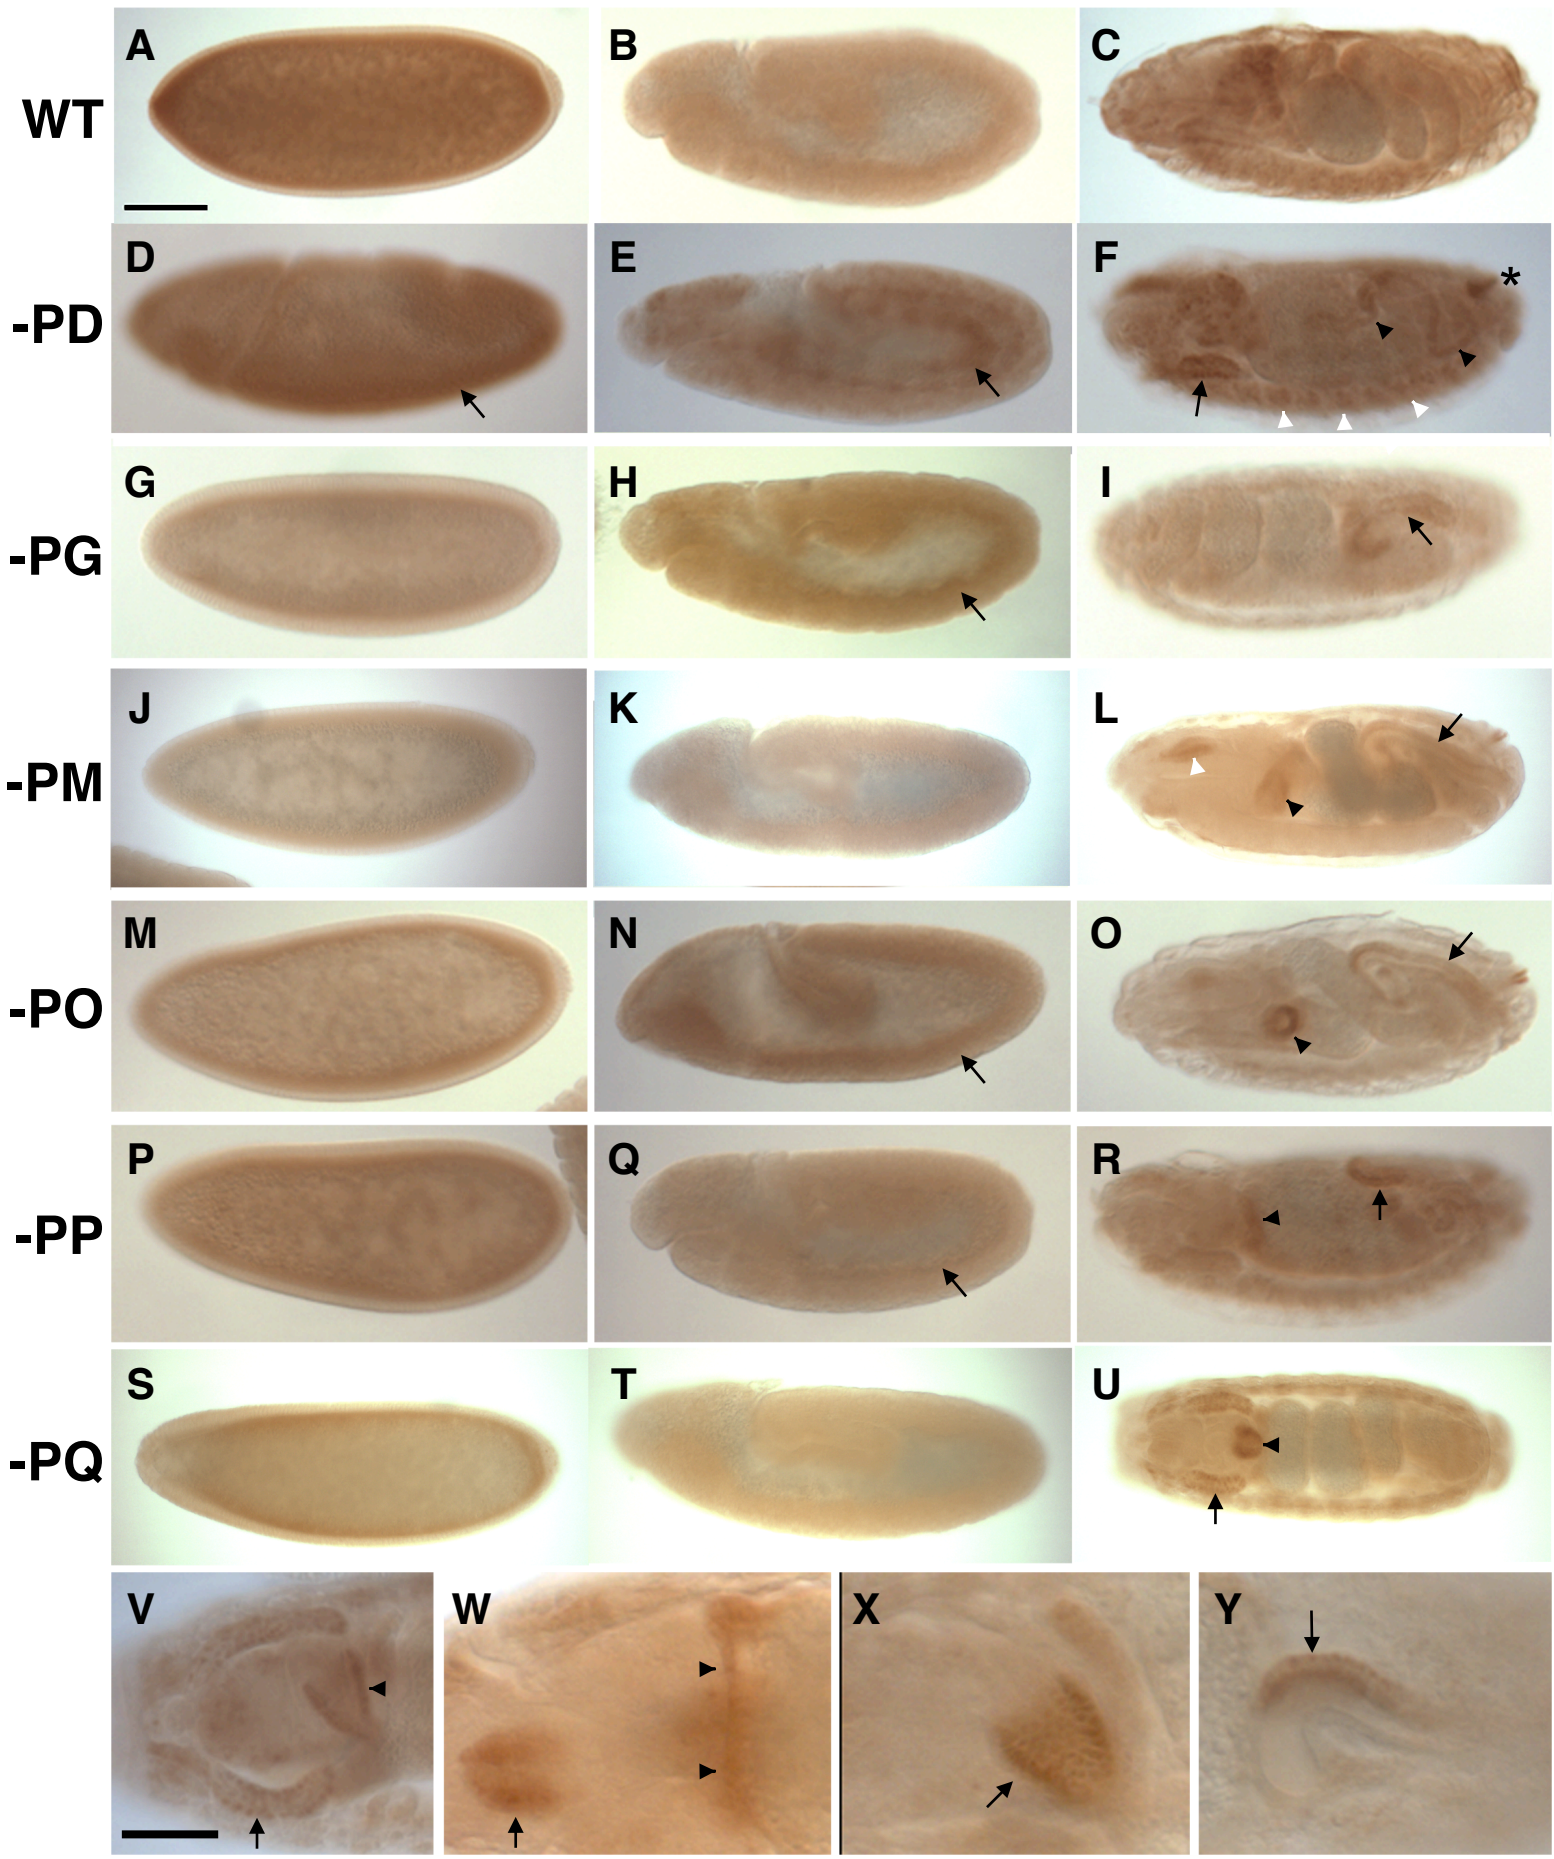

**Figure S2**
